# Supplementary material for: Mammalian cell entry genes in Streptomyces may provide clues to the evolution of bacterial virulence
Source: PubMed Central journal article supplement — Sci Rep. 2013 Jan 23;3:1109. doi: 10.1038/srep01109 (PMC3552289; doi:10.1038/srep01109), 2013-01-23
Supplement: srep01109-s1.pdf [file srep01109-s1.pdf]

**Figure S1: Supporting data showing the effect of dilution of nutrient agar on the equalization of growth of the amoebae and *Streptomyces***

**Mammalian cell entry genes in *Streptomyces* may provide clues to the evolution of bacterial virulence.**

Laura C. Clark, Ryan F. Seipke, Pilar Prieto, Joost Willemse, Gilles P. van Wezel, Matthew I.

Hutchings and Paul A. Hoskisson

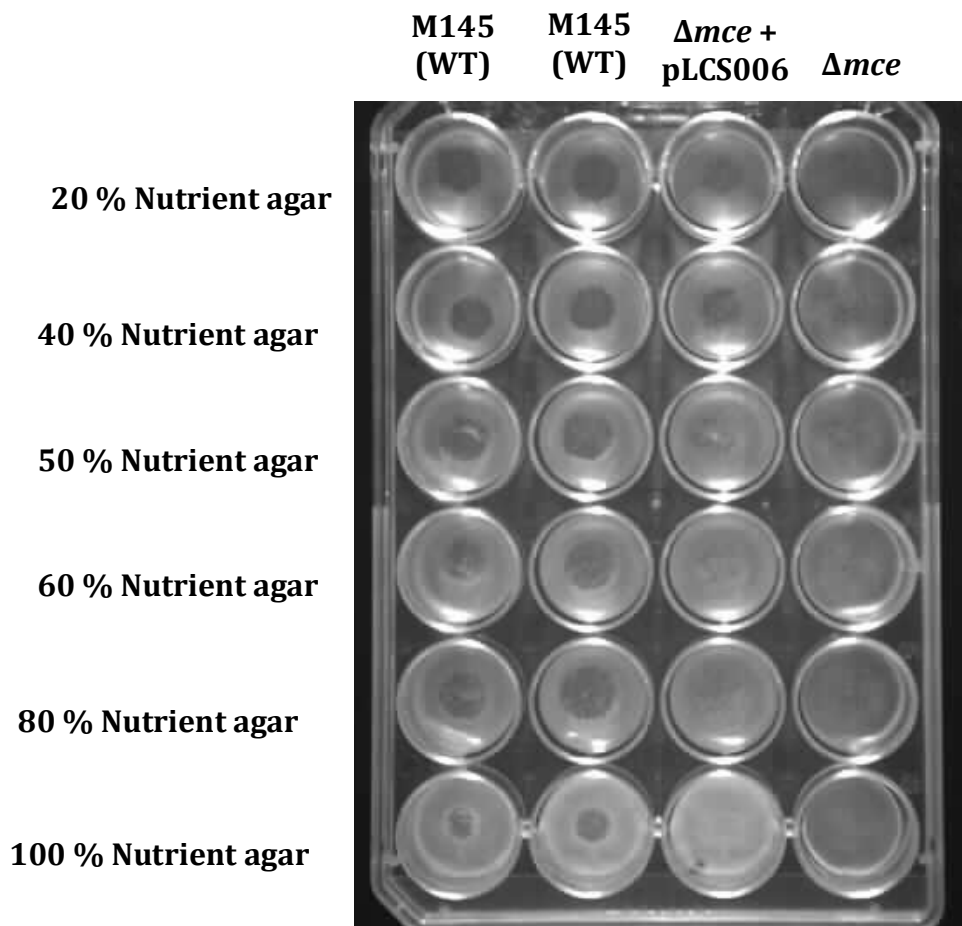

**Additional data to support the work:** Dilution of nutrient agar (indicated on the left hand side of the panel) with a 1000 amoebae added to the bacterial lawns according to the method of Froquet et al., (2008; Nature Protocols 4, 25–30.). These data show that the amoebae can clear a zone within the bacterial lawn on the WT *S. coelicolor* reproducibly over a range of dilutions of the medium. The addition of the amoebae to a lawn of the  $\Delta mce$  mutant does not produce a zone of clearing due to the killing effect of this mutant on the amoebae. Complementation of the mutant ( $\Delta mce$  + pLCS006) restores the wild-type phenotype.
